# Supplementary material for: Epithelial ovarian carcinoma diagnosis by desorption electrospray ionization mass spectrometry imaging
Source: Sci Rep. 2016 Dec 15;6:39219. doi: 10.1038/srep39219 (PMC5156945; doi:10.1038/srep39219)
Supplement: Supplementary Data [file srep39219-s1.pdf]

# Supplementary Data

## Epithelial ovarian carcinoma diagnosis by Desorption Electrospray Ionization Mass Spectrometry Imaging

Maria Luisa Dória, James S. McKenzie, Anna Mróz, David L Phelps, Abigail Speller,  
Francesca Rosini, Nicole Strittmatter, Ottmar Golf, Kirill Veselkov, Robert Brown, Sadaf Ghaem-  
Maghami, Zoltan Takats

Department of Surgery and Cancer, Faculty of Medicine, Imperial College London, London,  
United Kingdom

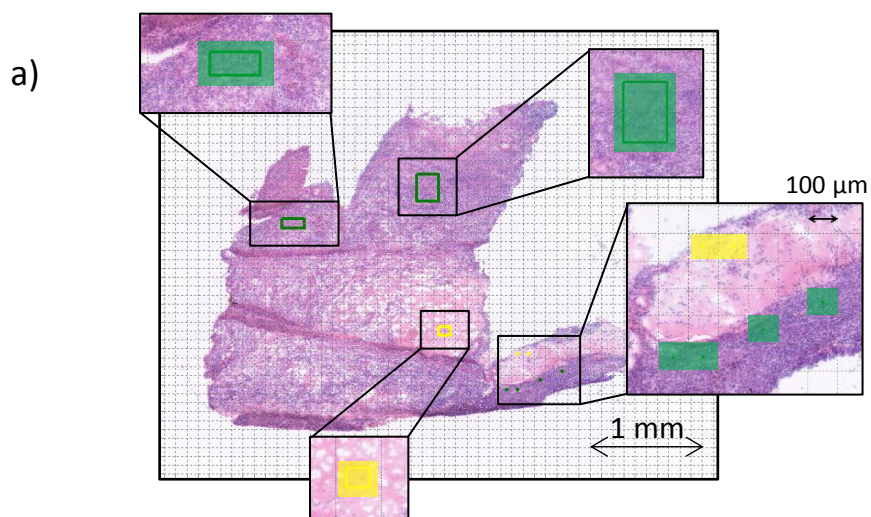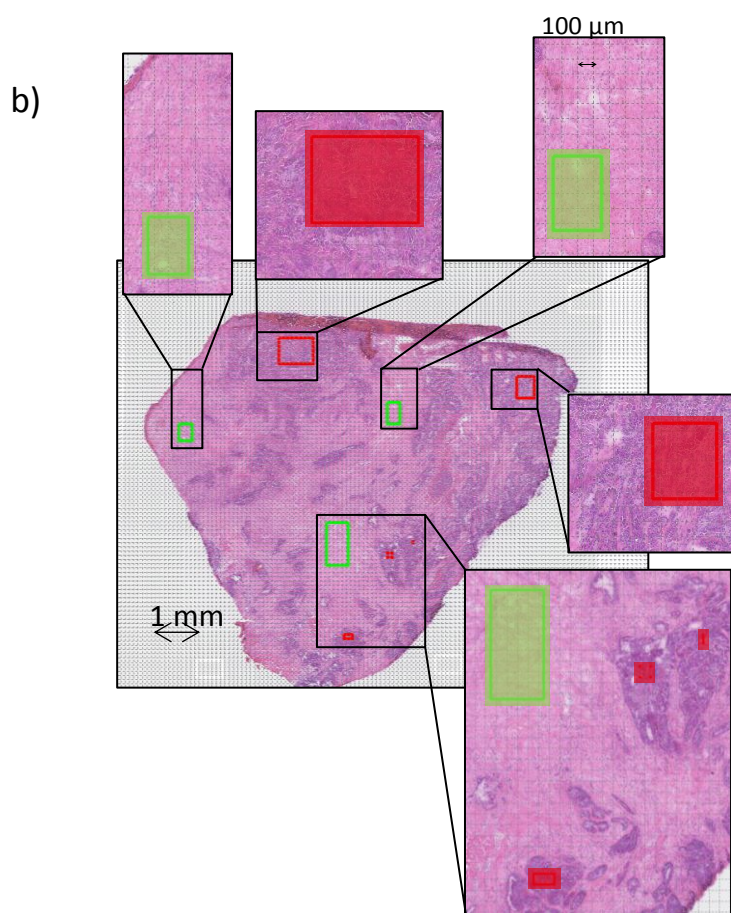

**Supplementary Figure 1:** Detailed annotations in a) Normal ovary with two different tissue types, normal stroma (green) and corpus albicans (yellow).and b) Serous carcinoma with two tissue types in each sample, stroma (green) and tumour tissue (red) Each grade square correspond to one pixel / spectrum.

II

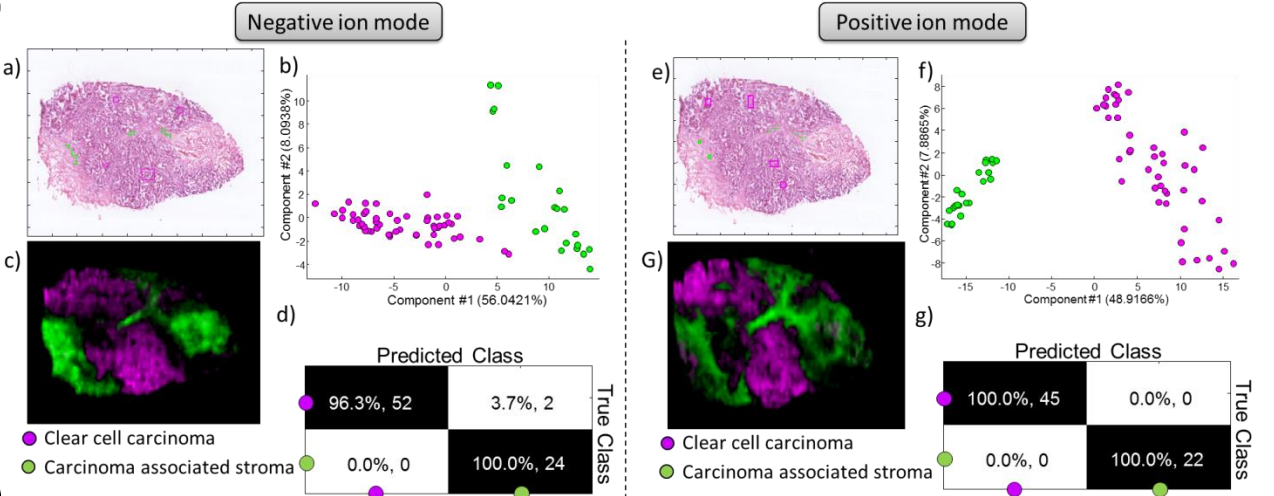

III

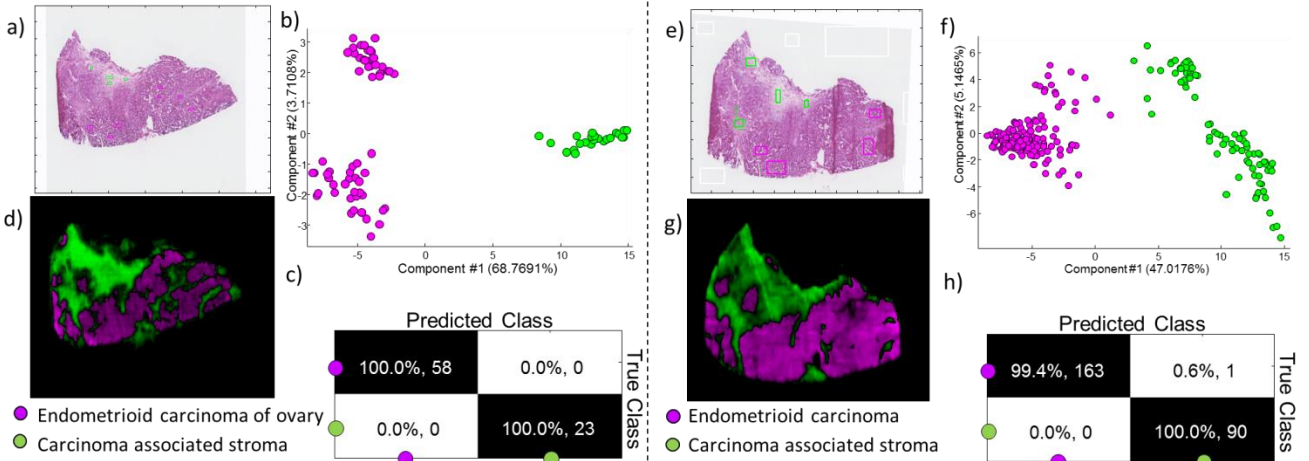

**Supplementary Figure 2:** Two different carcinomas analysed in negative and positive ion mode, I clear cell carcinoma II and endometrioid carcinoma. Each sample has two tissue types, stroma (green) and carcinoma tissue (pink), Data acquired in negative ion mode and positive ion mode. a) and e) Optical image and b) and f) PCA analysis of selected regions of interest. c) and g) predicted RMMC components with d) and h) leave one out cross validation together

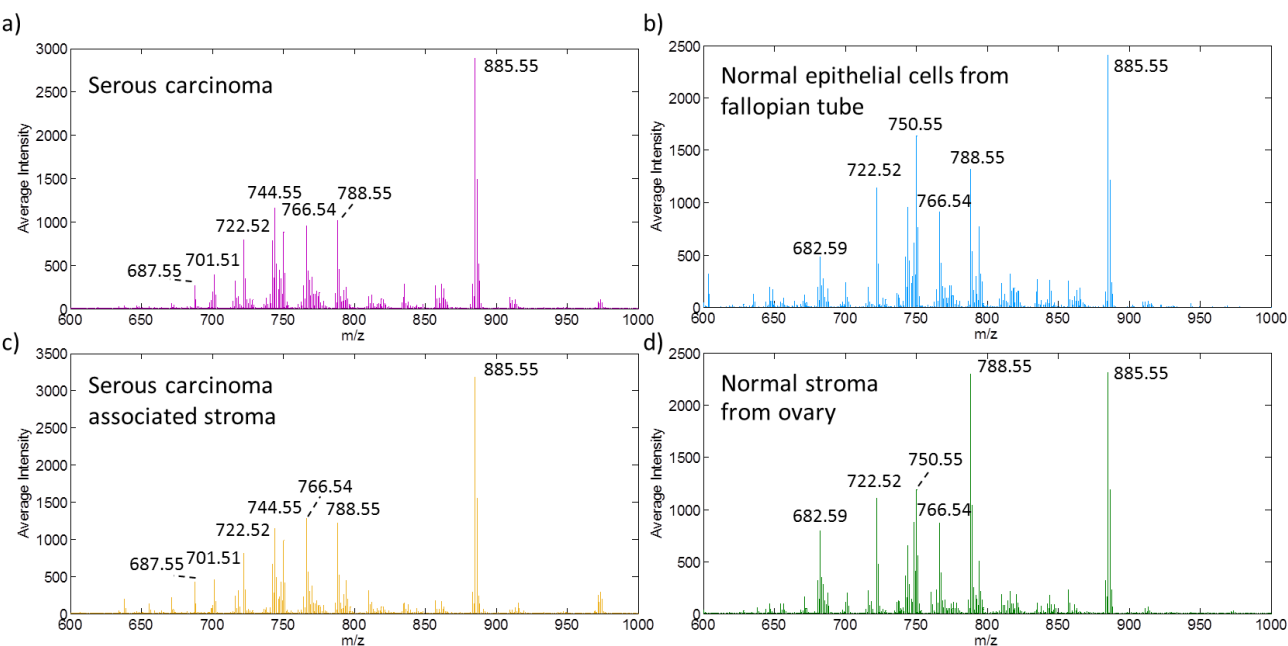

**Supplementary Figure 3:** Average spectra of four different tissue types, a) Serous carcinoma from ovary, b) normal epithelium from healthy fallopian tube, c) Serous carcinoma associated stroma and d) normal stroma from normal appearance ovary.

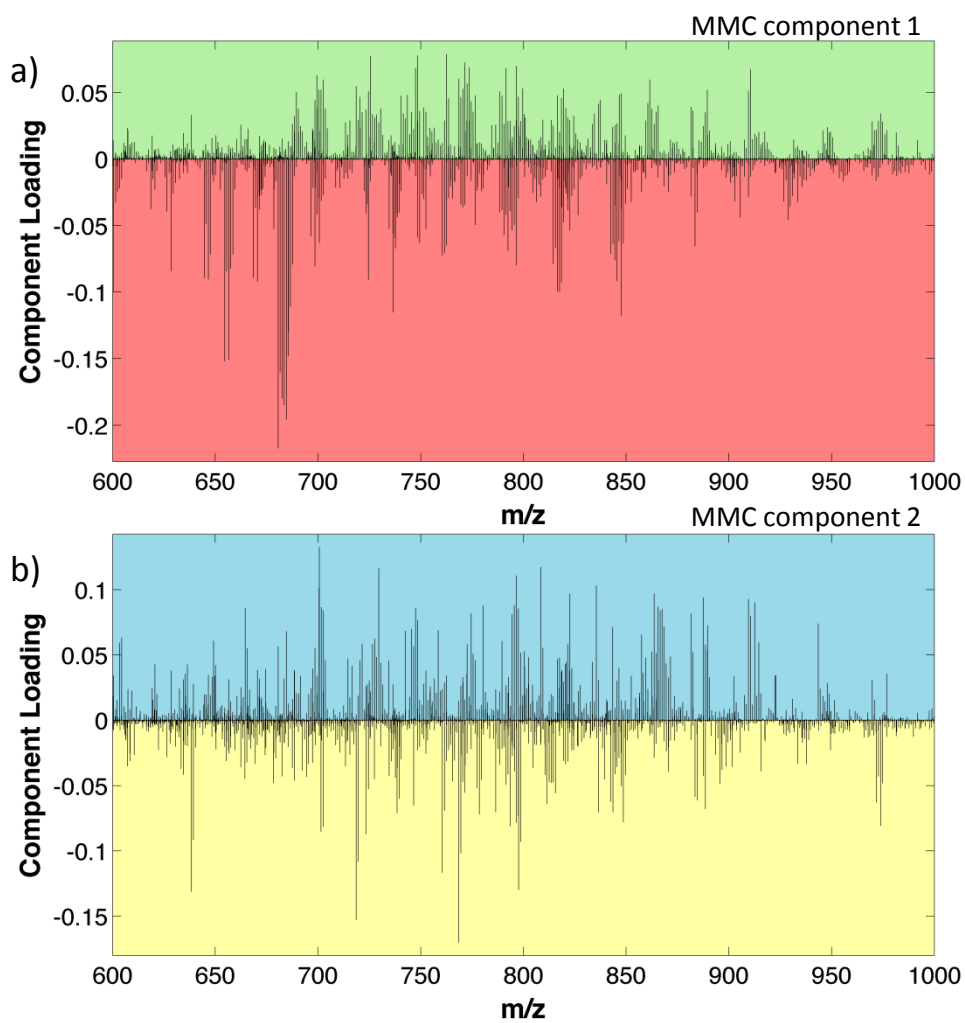

**Supplementary Figure 4:** RMMC component weights for latent variables a) 1 and b) 2.

| m/z      | adduct              | ID         | Loading Value | m/z                                                                                                                                                     | adduct             | ID                     | Loading Value |
|----------|---------------------|------------|---------------|---------------------------------------------------------------------------------------------------------------------------------------------------------|--------------------|------------------------|---------------|
| 725.5164 | [M-H] <sup>-</sup>  | PA(38:3)   | 0.08          | 796.5465                                                                                                                                                | [M-H] <sup>-</sup> | PS(P-38:3)/ PS(O-38:4) | 0.11          |
| 762.5125 | [M-H] <sup>-</sup>  | PE(38:6)   | 0.08          | 808.5056                                                                                                                                                | [M-H] <sup>-</sup> | PS(38:5)               | 0.12          |
| 771.5225 | [M-H] <sup>-</sup>  | PG(36:3)   | 0.07          | 718.5425                                                                                                                                                | [M-H] <sup>-</sup> | PE(34:0)               | -0.15         |
| 796.5915 | [M-H] <sup>-</sup>  | PE(40:3)   | 0.07          | 760.5175                                                                                                                                                | [M-H] <sup>-</sup> | PS(34:1)               | -0.12         |
| 654.5625 | [M+Cl] <sup>-</sup> | Cer(d40:2) | -0.15         | <div>Positive latent variable 1</div> <div>Negative latent variable 1</div> <div>Positive latent variable 2</div> <div>Negative latent variable 2</div> |                    |                        |               |
| 656.5785 | [M+Cl] <sup>-</sup> | Cer(d40:1) | -0.15         |                                                                                                                                                         |                    |                        |               |
| 684.5925 | [M+Cl] <sup>-</sup> | Cer(d42:1) | -0.2          |                                                                                                                                                         |                    |                        |               |
|          |                     |            |               |                                                                                                                                                         |                    |                        |               |

**Supplementary Table 1:** Identified *m/z* values with the highest loading values from RMMC component weights 1 and 2

**Supplementary Table 2:** *m/z* values with possible IDs, p-values, q-values and class where they are significant, together with mean intensities and mean log<sub>2</sub> fold change equal or greater than 1

| <i>m/z</i> | IDs                  | Tissue Diff | ANOVA pVal | ANOVA qVal | MEAN      |           |           |           | MEAN Fold Change     |                   |                      |
|------------|----------------------|-------------|------------|------------|-----------|-----------|-----------|-----------|----------------------|-------------------|----------------------|
|            |                      |             |            |            | HealthyFT | HealthyOv | Serous    | Stroma    | Serous/<br>HealthyOv | Serous/<br>Stroma | Stroma/<br>HealthyOv |
| 701.52     | PA(36:1)             | Stroma      | 6.48E-06   | 1.28E-04   | 92.2277   | 198.6975  | 392.0609  | 454.1372  | 1.0                  | -0.2              | 1.2                  |
| 723.50     | PA(38:4)             | Stroma      | 1.38E-04   | 1.68E-03   | 5.8757    | 23.0745   | 47.5043   | 74.0624   | 1.0                  | -0.6              | 1.7                  |
| 699.50     | PA(36:2)             | Serous      | 2.16E-06   | 4.71E-05   | 18.6893   | 24.2049   | 96.1852   | 68.2801   | 2.0                  | 0.5               | 1.5                  |
| 725.52     | PA(38:3)             | Serous      | 1.33E-03   | 1.29E-02   | 7.7482    | 7.2642    | 61.7486   | 54.1963   | 3.1                  | 0.2               | 2.9                  |
| 747.50     | PA(40:6)             | Serous      | 1.27E-04   | 1.57E-03   | 0         | 1.0101    | 38.202    | 28.5214   | 5.2                  | 0.4               | 4.8                  |
| 760.52     | PS(34:1)             | HealthyOv   | 1.11E-16   | 1.55E-14   | 4.3843    | 206.877   | 45.8586   | 44.7503   | -2.2                 | 0.0               | -2.2                 |
| 842.60     | PS(40:2)             | HealthyOv   | 9.63E-11   | 5.01E-09   | 17.5186   | 88.463    | 19.6866   | 23.9334   | -2.2                 | -0.3              | -1.9                 |
| 796.55     | PS(P-38:3)           | HealthyFT   | 2.23E-308  | 3.89E-306  | 245.536   | 131.3943  | 47.2799   | 32.8963   | -1.5                 | 0.5               | -2.0                 |
| 822.56     | PS(P-40:4)           | HealthyOv   | 3.62E-06   | 7.57E-05   | 33.8631   | 37.169    | 15.5539   | 8.5823    | -1.3                 | 0.9               | -2.1                 |
| 788.55     | PS(36:1)             | HealthyOv   | 2.23E-308  | 4.18E-306  | 1320.4233 | 2302.4566 | 1013.3137 | 1217.6882 | -1.2                 | -0.3              | -0.9                 |
| 836.55     | PS(40:5)             | Stroma      | 1.10E-02   | 1.00E+00   | 29.6201   | 17.3117   | 41.288    | 61.5108   | 1.3                  | -0.6              | 1.8                  |
| 834.53     | PS(40:6)             | HealthyFT   | 1.21E-02   | 1.00E+00   | 140.6539  | 33.1473   | 131.7306  | 130.4371  | 2.0                  | 0.0               | 2.0                  |
| 862.56     | PS(42:6)             | Serous      | 1.21E-08   | 4.30E-07   | 58.367    | 29.0567   | 126.6541  | 59.8317   | 2.1                  | 1.1               | 1.0                  |
| 860.54     | PS(42:7)             | Serous      | 3.22E-08   | 1.05E-06   | 13.01     | 12.3084   | 55.6455   | 21.8686   | 2.2                  | 1.3               | 0.8                  |
| 888.57     | PS(44:7)             | Serous      | 4.14E-09   | 1.58E-07   | 123.359   | 68.0586   | 320.5055  | 134.6557  | 2.2                  | 1.3               | 1.0                  |
| 864.57     | PS(42:5)             | Serous      | 2.15E-06   | 4.72E-05   | 52.4406   | 14.7539   | 104.446   | 34.5072   | 2.8                  | 1.6               | 1.2                  |
| 836.54     | PS(40:5)             | Serous      | 3.29E-04   | 3.60E-03   | 13.4375   | 4.7497    | 56.7163   | 13.9188   | 3.6                  | 2.0               | 1.6                  |
| 882.53     | PS(44:10)            | Serous      | 3.53E-06   | 7.40E-05   | 1.412     | 0.9965    | 20.257    | 3.815     | 4.3                  | 2.4               | 1.9                  |
| 748.53     | PE(P-38:5)           | HealthyOv   | 9.93E-13   | 7.14E-11   | 615.4524  | 879.678   | 344.2639  | 418.3954  | -1.4                 | -0.3              | -1.1                 |
| 714.51     | PE(34:2)             | Serous      | 3.42E-06   | 7.21E-05   | 14.9338   | 41.8857   | 85.5191   | 35.2683   | 1.0                  | 1.3               | -0.2                 |
| 742.54     | PE(36:2)             | Serous      | 1.77E-06   | 3.99E-05   | 477.5988  | 366.1549  | 786.0731  | 660.3064  | 1.1                  | 0.3               | 0.9                  |
| 768.56     | PE(38:3)             | Serous      | 1.58E-06   | 3.61E-05   | 196.3088  | 126.3147  | 329.4129  | 293.3299  | 1.4                  | 0.2               | 1.2                  |
| 726.55     | PE(P-36:2)           | Serous      | 2.00E-06   | 4.44E-05   | 85.9153   | 41.6245   | 109.5308  | 41.062    | 1.4                  | 1.4               | 0.0                  |
| 740.53     | PE(36:3)             | Serous      | 1.20E-06   | 2.82E-05   | 52.5928   | 59.9218   | 162.1856  | 85.3712   | 1.4                  | 0.9               | 0.5                  |
| 770.57     | PE(38:2)             | Stroma      | 1.50E-06   | 3.47E-05   | 180.8012  | 132.4103  | 370.0506  | 375.8993  | 1.5                  | 0.0               | 1.5                  |
| 690.51     | PE(32:0)             | Serous      | 3.14E-03   | 2.78E-02   | 1.6379    | 8.2168    | 26.3467   | 16.7422   | 1.7                  | 0.7               | 1.0                  |
| 728.56     | PE(P-36:1)           | Serous      | 2.47E-07   | 6.68E-06   | 72.7844   | 31.037    | 103.3221  | 40.8148   | 1.7                  | 1.3               | 0.4                  |
| 724.53     | PE(P-36:3)           | Serous      | 1.39E-07   | 3.88E-06   | 11.8338   | 30.1446   | 102.4665  | 43.2861   | 1.8                  | 1.2               | 0.5                  |
| 772.59     | PE(38:1)             | Serous      | 7.40E-05   | 9.96E-04   | 82.7213   | 47.5517   | 168.408   | 126.2506  | 1.8                  | 0.4               | 1.4                  |
| 752.56     | PE(P-38:3)           | Serous      | 2.01E-04   | 2.33E-03   | 9.4364    | 21.0165   | 80.2659   | 47.0134   | 1.9                  | 0.8               | 1.2                  |
| 820.59     | PE(42:5)             | Serous      | 7.73E-04   | 7.77E-03   | 0         | 3.9672    | 15.942    | 9.6812    | 2.0                  | 0.7               | 1.3                  |
| 788.53     | PE(40:7)             | Serous      | 2.06E-06   | 4.53E-05   | 20.052    | 13.0912   | 59.6556   | 32.1204   | 2.2                  | 0.9               | 1.3                  |
| 698.52     | PE(P-34:2)           | Serous      | 4.27E-05   | 6.38E-04   | 13.8066   | 12.4434   | 68.5407   | 14.4298   | 2.5                  | 2.2               | 0.2                  |
| 818.58     | PE(42:6)             | Serous      | 2.49E-04   | 2.81E-03   | 0         | 2.3533    | 17.885    | 10.3796   | 2.9                  | 0.8               | 2.1                  |
| 720.50     | PE(P-36:5)           | Serous      | 5.61E-05   | 7.93E-04   | 9.8902    | 3.7886    | 31.5205   | 8.1097    | 3.1                  | 2.0               | 1.1                  |
| 796.59     | PE(40:3)             | Serous      | 5.08E-06   | 1.03E-04   | 5.9128    | 3.9787    | 38.4611   | 24.3157   | 3.3                  | 0.7               | 2.6                  |
| 816.56     | PE(42:7)             | Serous      | 5.24E-10   | 2.33E-08   | 0         | 1.3278    | 14.9384   | 5.1635    | 3.5                  | 1.5               | 2.0                  |
| 762.51     | PE(38:6)             | Serous      | 5.92E-05   | 8.27E-04   | 48.5122   | 4.8984    | 80.8939   | 49.1363   | 4.0                  | 0.7               | 3.3                  |
| 819.53     | PI(P-34:1)           | HealthyOv   | 4.35E-05   | 6.49E-04   | 0         | 41.7619   | 6.4232    | 3.1178    | -2.7                 | 1.0               | -3.7                 |
| 847.57     | PI(P-36:1)           | HealthyOv   | 4.13E-07   | 1.08E-05   | 5.0527    | 15.8385   | 3.5778    | 3.0651    | -2.1                 | 0.2               | -2.4                 |
| 911.57     | PI(40:5)             | Serous      | 2.53E-07   | 6.81E-06   | 47.3651   | 46.3707   | 98.5977   | 51.0697   | 1.1                  | 0.9               | 0.1                  |
| 835.54     | PI(34:1) (TG2)       | Serous      | 1.73E-06   | 3.92E-05   | 259.8877  | 103.4147  | 285.9541  | 149.766   | 1.5                  | 0.9               | 0.5                  |
| 861.55     | PI(36:2) (TG2)       | Serous      | 2.14E-08   | 7.07E-07   | 101.657   | 84.4465   | 283.8352  | 163.8657  | 1.7                  | 0.8               | 1.0                  |
| 833.52     | PI(34:2) (TG2)       | Serous      | 2.31E-06   | 5.00E-05   | 33.1697   | 21.5355   | 74.2741   | 27.9      | 1.8                  | 1.4               | 0.4                  |
| 859.54     | PI(36:3)             | Serous      | 4.75E-08   | 1.47E-06   | 68.0294   | 29.795    | 124.4219  | 56.1878   | 2.1                  | 1.1               | 0.9                  |
| 809.52     | PI(32:0)             | Serous      | 1.51E-02   | 1.00E+00   | 0.8766    | 5.2895    | 25.2308   | 8.1522    | 2.3                  | 1.6               | 0.6                  |
| 863.57     | PI(36:1)/TG(P-56:19) | Serous      | 2.45E-06   | 5.28E-05   | 163.2614  | 44.8395   | 227.9436  | 89.0283   | 2.3                  | 1.4               | 1.0                  |
| 881.52     | PI(38:6)             | Serous      | 5.55E-07   | 1.40E-05   | 14.5945   | 7.0277    | 50.9248   | 13.0963   | 2.9                  | 2.0               | 0.9                  |
| 909.55     | PI(40:6)             | Serous      | 9.92E-12   | 5.92E-10   | 46.864    | 17.8414   | 131.5908  | 44.6693   | 2.9                  | 1.6               | 1.3                  |
| 889.57     | PI(38:2)/TG(P-58:20) | Serous      | 4.49E-07   | 1.16E-05   | 2.6187    | 5.9681    | 55.4325   | 21.448    | 3.2                  | 1.4               | 1.8                  |
| 865.57     | PI(36:0)             | Serous      | 1.06E-05   | 1.98E-04   | 1.6403    | 0.3586    | 18.751    | 4.0434    | 5.7                  | 2.2               | 3.5                  |
| 654.56     | Cer(d40:2)           | HealthyOv   | 2.23E-308  | 3.63E-305  | 50.5737   | 91.8955   | 0.2695    | 0.0816    | -8.4                 | 1.7               | -10.1                |
| 656.58     | Cer(d40:1)           | HealthyOv   | 2.23E-308  | 1.81E-305  | 86.7238   | 98.782    | 1.9053    | 1.2988    | -5.7                 | 0.6               | -6.2                 |
| 682.59     | Cer(d42:2)           | HealthyOv   | 2.23E-308  | 7.77E-306  | 478.2389  | 792.2141  | 25.3537   | 29.6576   | -5.0                 | -0.2              | -4.7                 |

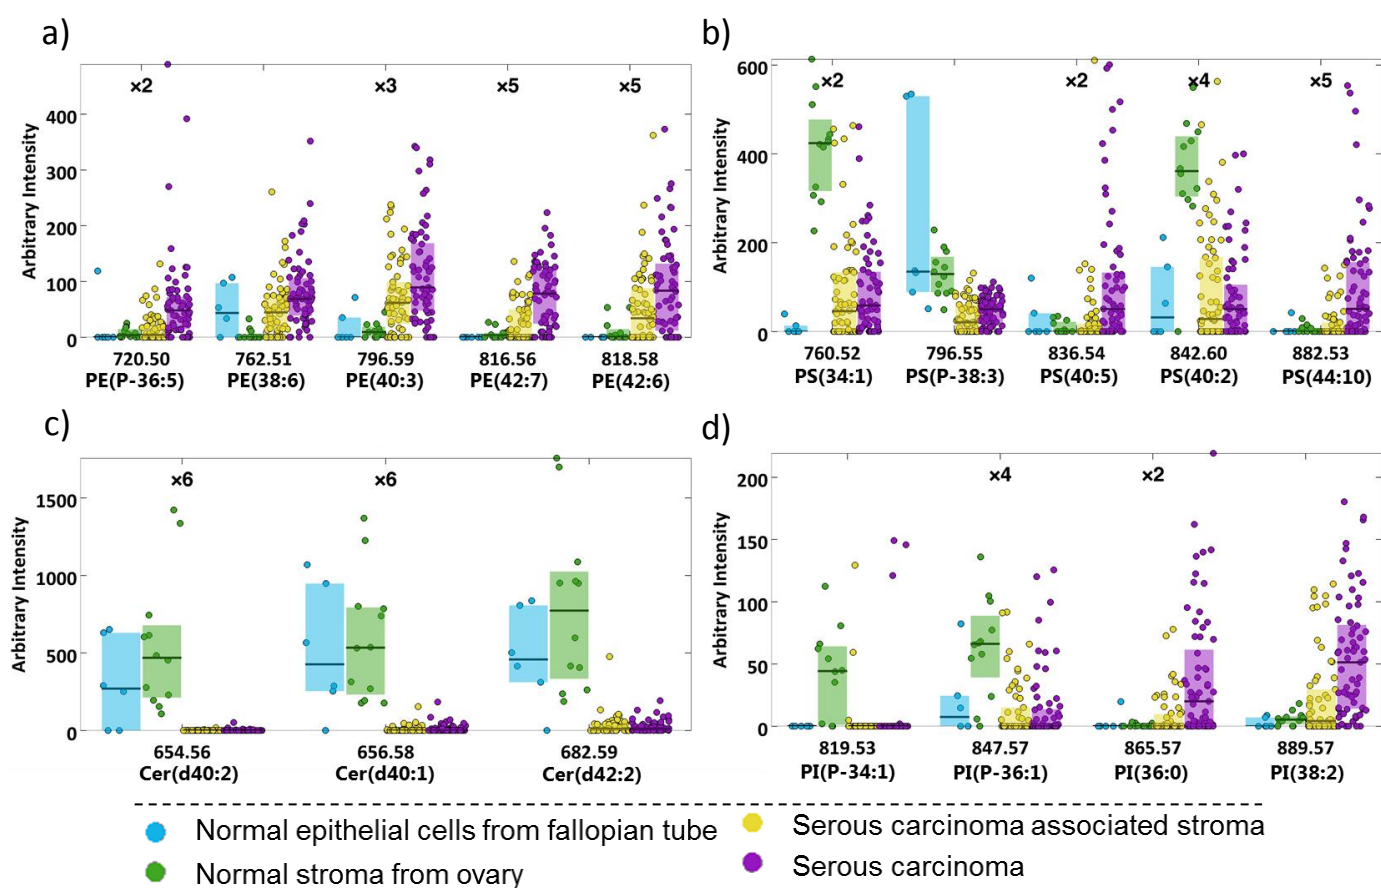

**Supplementary Figure 5:** Box plots of different lipid species from five phospholipid and sphingolipid classes a) phosphatidylethanolamine, b) phosphatidylserine, c) ceramide and d) phosphatidylinositol

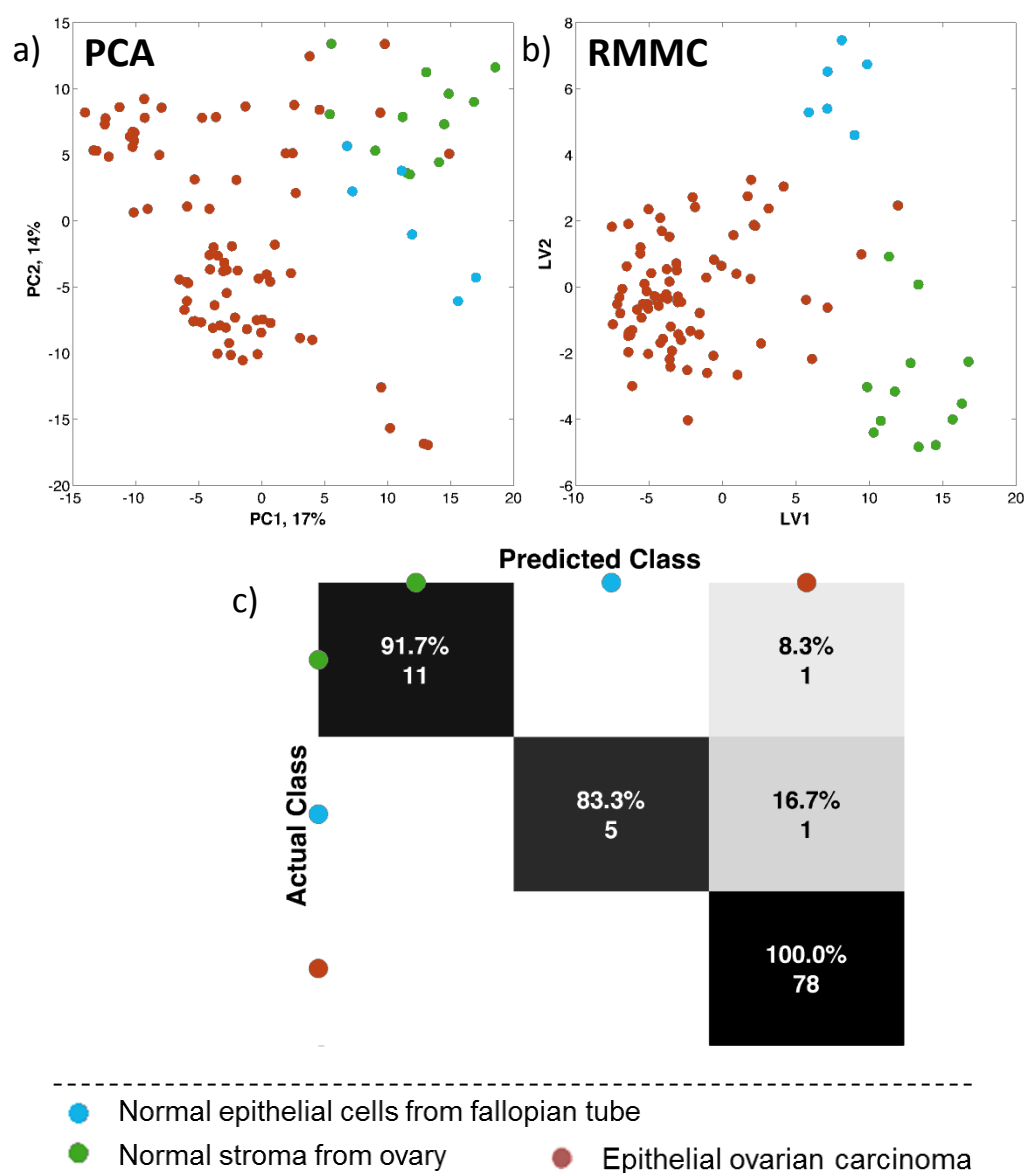

**Supplementary Figure 6:** Statistical analysis of DESI MS spectrum between  $m/z$  600-1000 from all EOCs together, normal stroma from normal ovary and normal epithelium from fallopian tube. a) PCA and b) RMMC scores plots with its respective c) leave-one-patient-out cross validation results

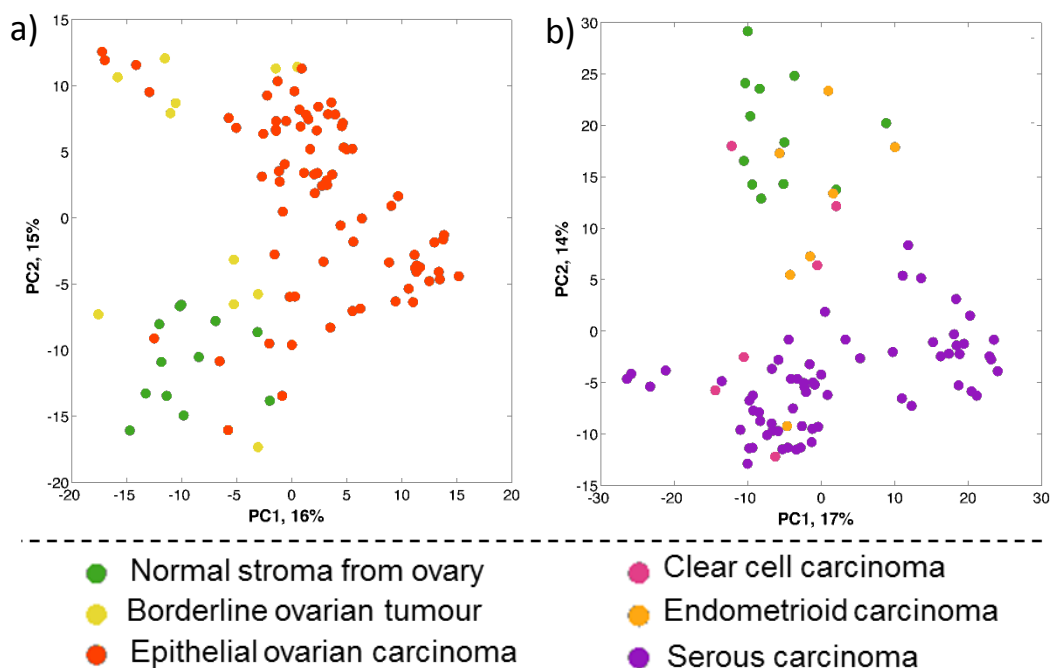

**Supplementary Figure 7:** Principle component analysis (PCA) of DESI MS spectrum between 600-1000Da from the a) all carcinomas together, borderline ovarian tumours and normal stroma from normal ovary, and b) different carcinomas as Serous, Endometrioid and Clear cell carcinomas together with normal stroma from normal ovary

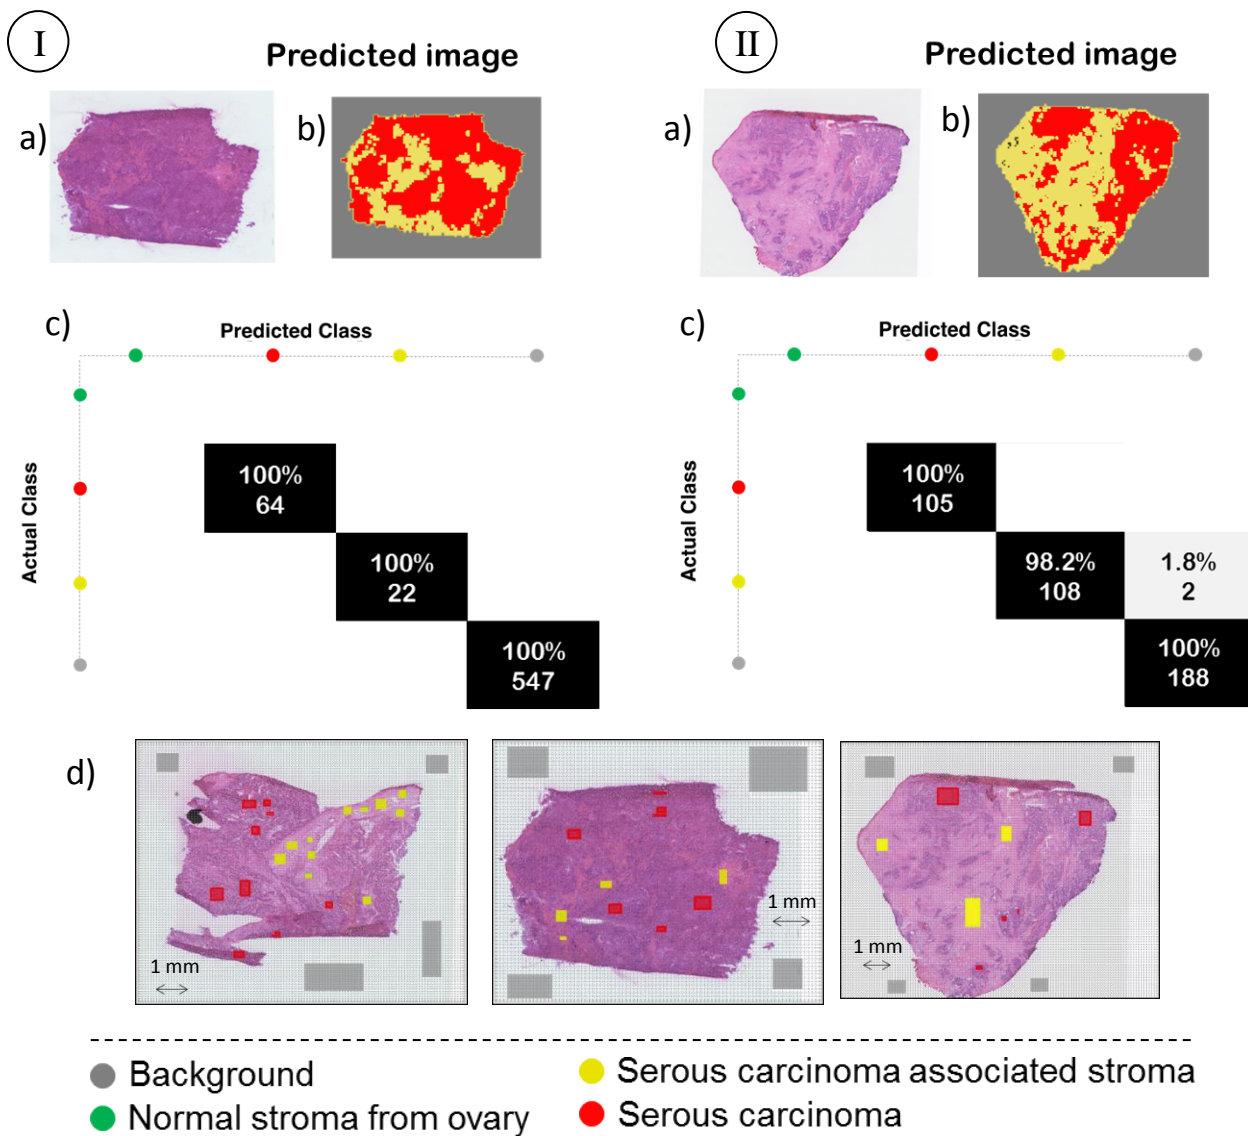

**Supplementary Figure 8:** Prediction of two independent sample using as training set the previous model (serous ovarian carcinoma). a) Optical image of the independent sample, b) predicted image and c) Leave one out cross validation results and d) respective regions of interest marked by histopathologist used for this validation.
